# Supplementary material for: α-Dialkylamino N,N-diisobutylacetamides: a new class of anion exchanger with intramolecular buffering properties
Source: Royal Society of Chemistry journal article supplement (doi:10.1039/c4ra03020f), 2014-01-01
Supplement: c4ra03020f1.pdf [file c4ra03020f1.pdf]

## **SUPPORTING INFORMATION**

### **$\alpha$ -Dialkylamino *N,N*-diisobutylacetamides: A new class of anion exchanger with intramolecular buffering properties**

**Shikha Sharma,<sup>1</sup> Sunil K. Ghosh,<sup>\*1</sup> Anitha M<sup>2</sup> and Joti N. Sharma<sup>\*3</sup>**

<sup>1</sup>Bio-Organic Division, Bhabha Atomic Research Centre, Trombay, Mumbai 400085, India

Tel: +91-22-25595012, Fax: +91-22-25505151; E-mail: ghsunil@barc.gov.in

<sup>2</sup>Rare Earths Development Section, Bhabha Atomic Research Centre, Trombay, Mumbai 400085, India

<sup>3</sup>Nuclear Recycle Group, Bhabha Atomic Research Centre, Trombay, Mumbai 400085, India

Tel: +91-22-25592959, Fax: +91-22-25505151; E-mail: jnsharma@barc.go

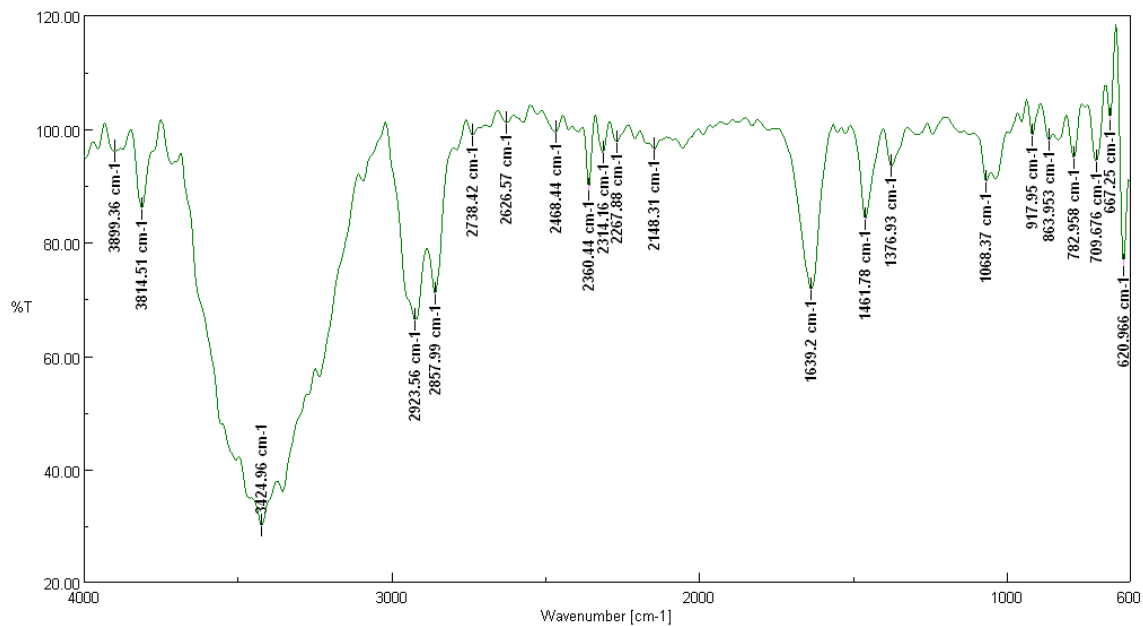

**Fig. 8 (a)** IR spectra of organic phase containing **1** before contact.

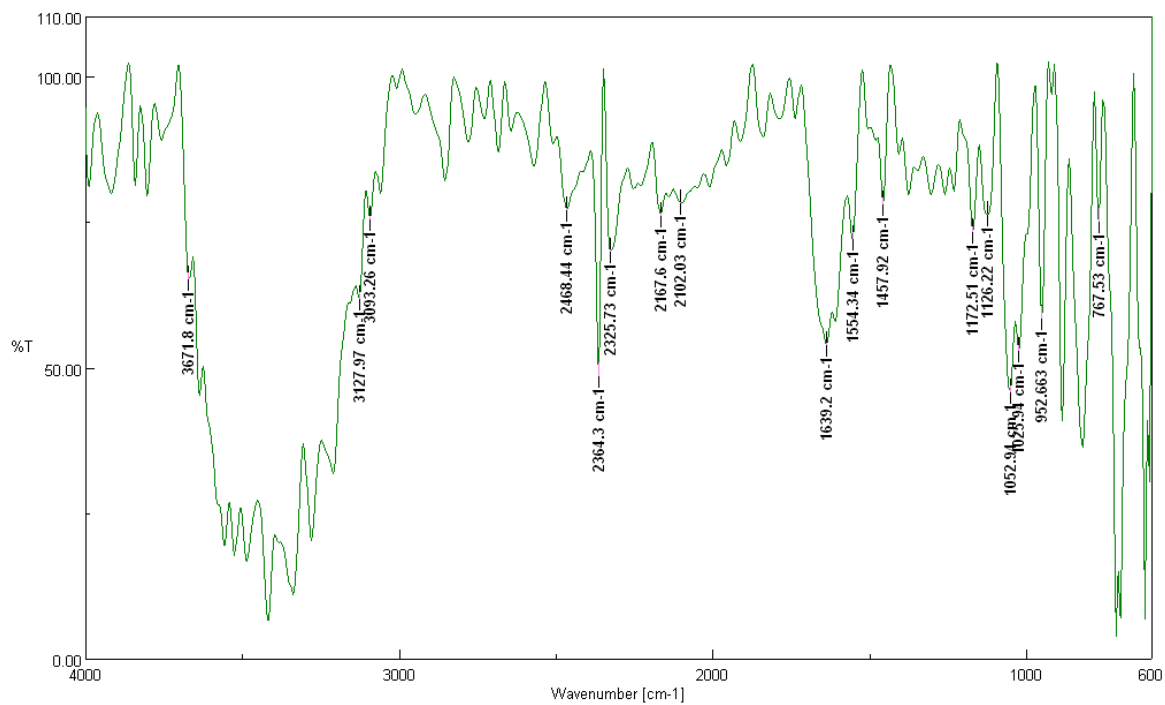

**Fig. 8 (b)** IR spectra of loaded organic phase (**1** and molybdate).

before

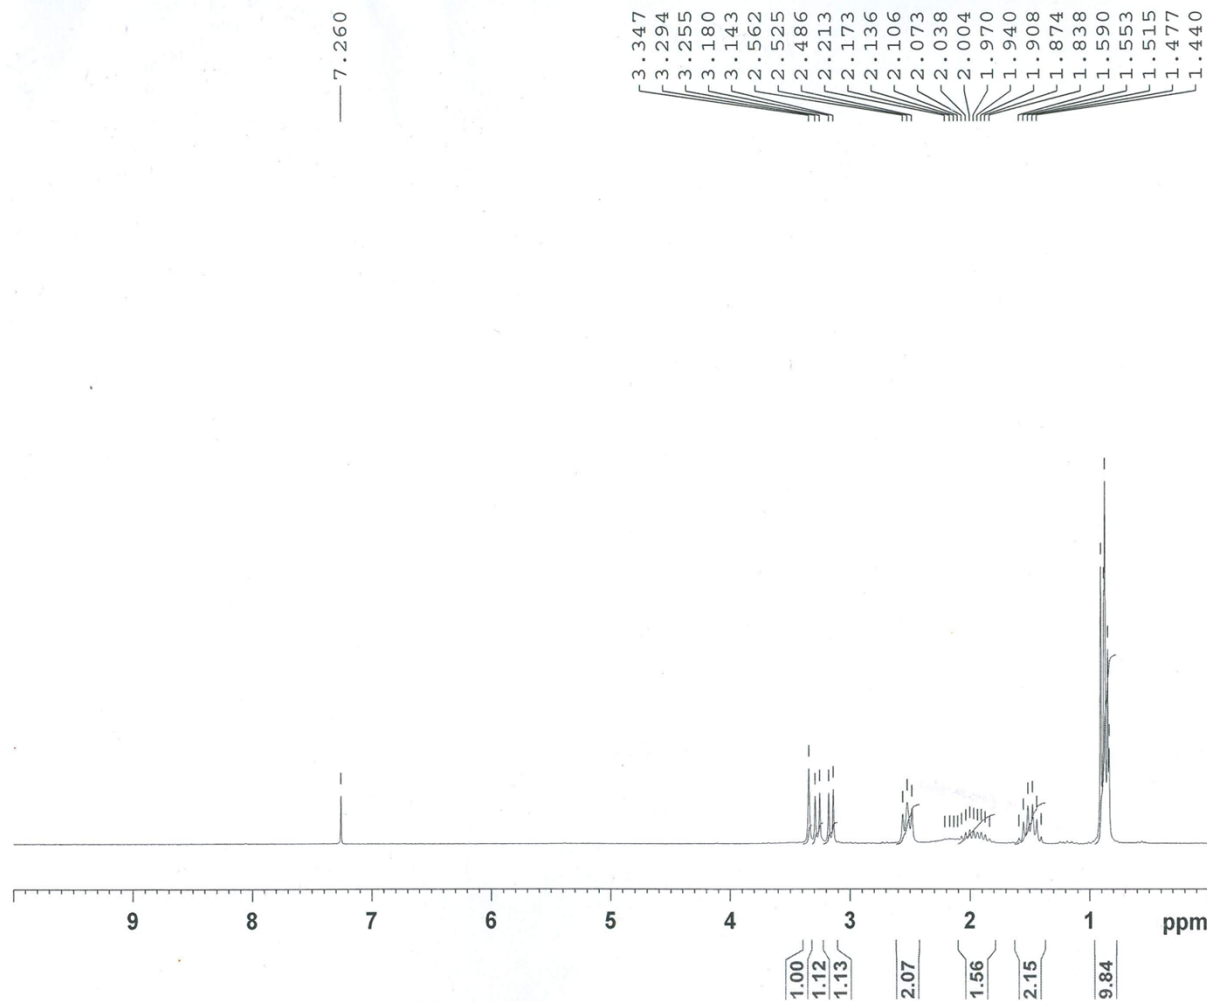

Fig. 9 (a)  $^1\text{H}$  NMR of  $\alpha$ -dipropylamino  $N,N'$ -diisobutylacetamide **1**.

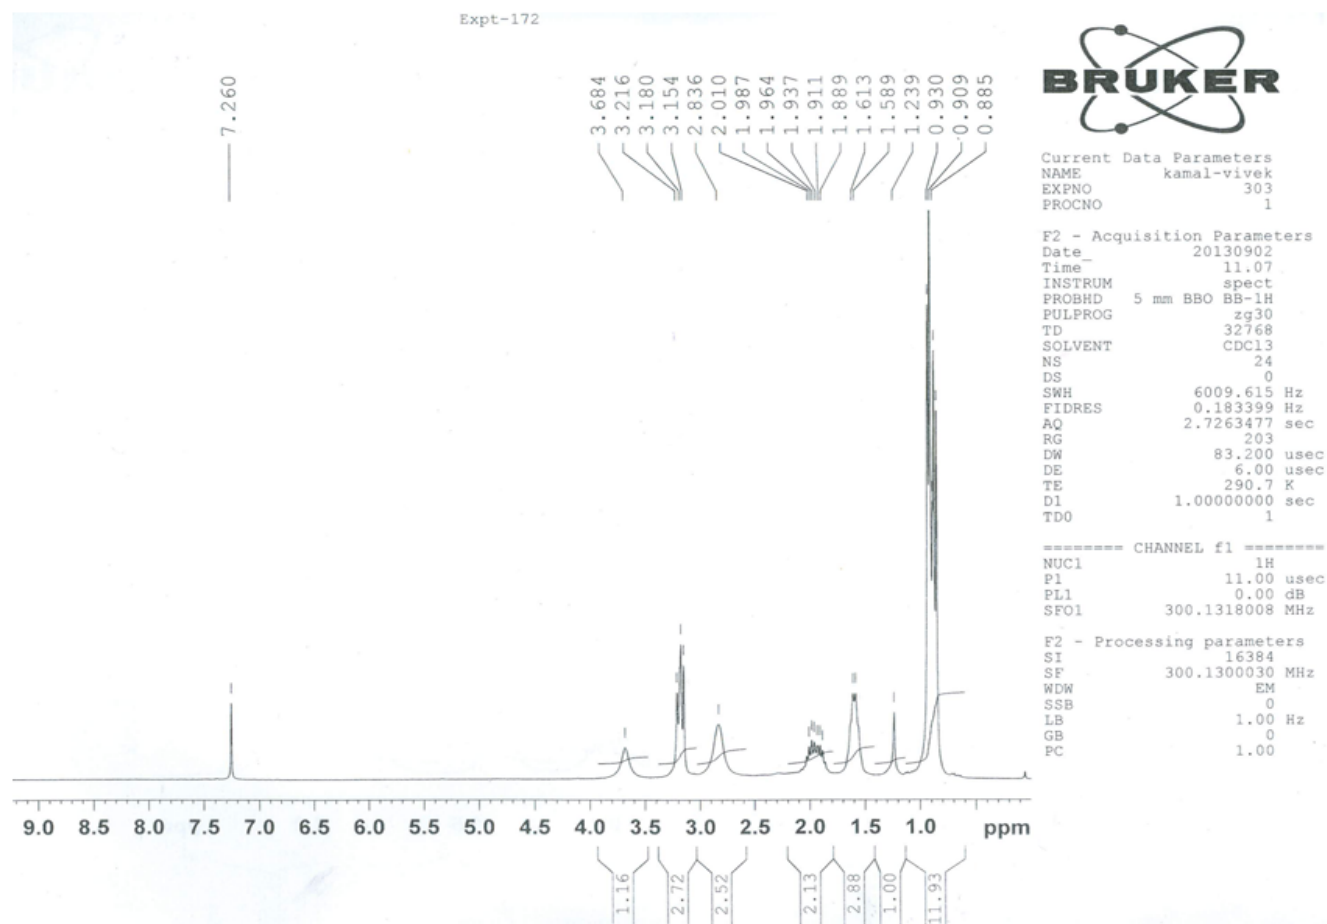

**Fig. 9 (b)**  $^1\text{H}$  NMR of complex of  $\text{MoO}_4^{2-}$  with  $\alpha$ -dipropylamino  $N,N'$ -diisobutylacetamide **1**.

snikna

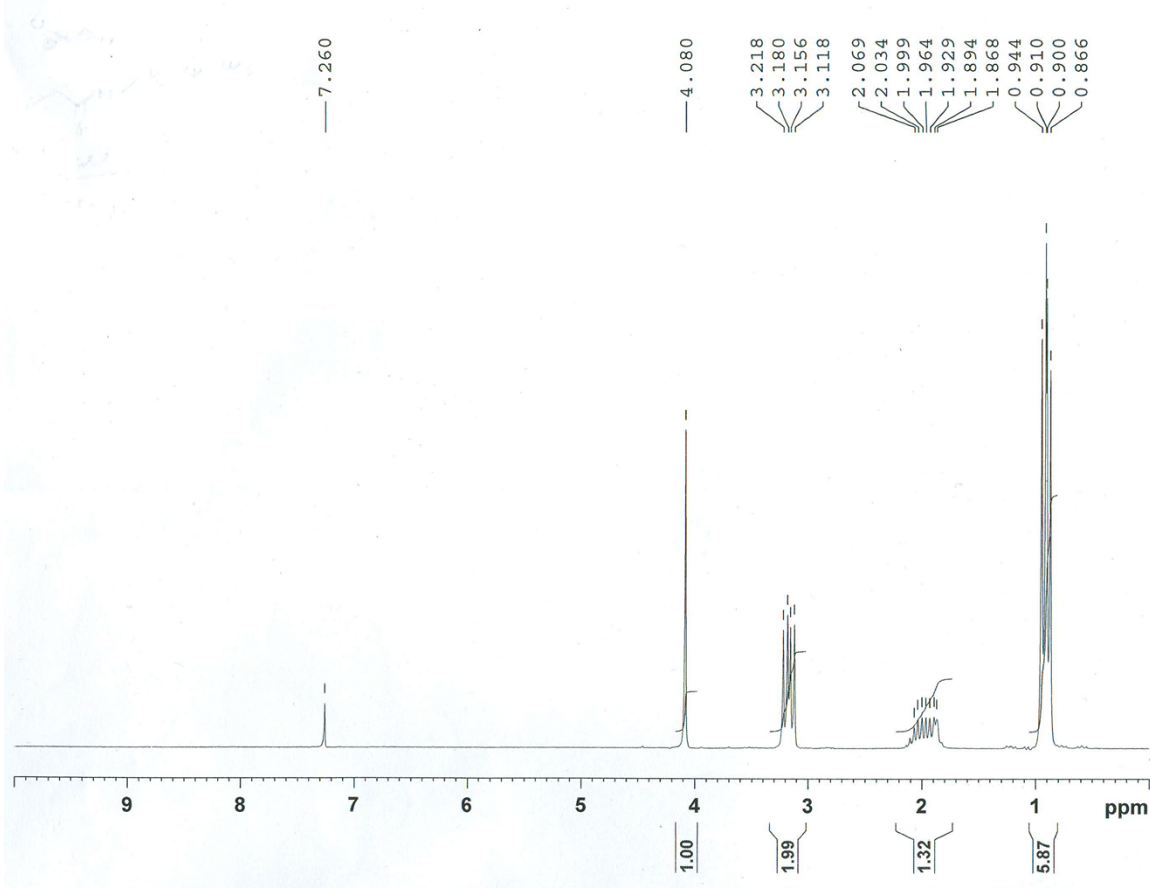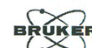

Current Data Parameters  
NAME Reha  
EXPNO 290  
PROCNO 1

F2 - Acquisition Parameters  
Date\_ 2010222  
Time 12.35  
INSTRUM spect  
PROBHD 5 mm BBO BB-H  
PULPROG zg30  
TD 65536  
SOLVENT CDCl3  
NS 6  
DS 2  
SWH 4132.201 Hz  
FIDRES 0.663053 Hz  
AQ 7.929959 sec  
RG 202.52  
DM 121.000 usec  
DE 6.50 usec  
TE 303.0 K  
D0 1.09000000 sec

\*\*\*\*\* CHANNEL f1 \*\*\*\*\*  
NUC1 1H  
P1 10.00 usec  
PL1 13.50000000 W  
SFO1 200.1312159 MHz

F2 - Processing parameters  
SI 65536  
SF 200.1300054 MHz  
WDW EM  
SSB 0  
LB 0.30 Hz  
GB 0  
PC 1.00

$^1\text{H}$  NMR of *N,N'*-diisobutylchloroacetamide 7.

|                        |                                                             |                       |                 |                 |            |                  |            |
|------------------------|-------------------------------------------------------------|-----------------------|-----------------|-----------------|------------|------------------|------------|
| Acquisition Time (sec) | 0.8851                                                      | Comment               | Pri Mama IB 13c | Date            | Dec 4 2013 | Date Stamp       | Dec 4 2013 |
| File Name              | l:\baro-sikha-4dec13\baro-sikha-4dec13\pre-mama-13c.fid\fid |                       |                 | Frequency (MHz) | 150.85     | Nucleus          | 13C        |
| Number of Transients   | 240                                                         | Original Points Count | 43254           | Points Count    | 65536      | Pulse Sequence   | s2ppl      |
| Solvent                | CHLOROFORM-d                                                | Spectrum Offset (Hz)  | 16176.1162      | Spectrum Type   | STANDARD   | Receiver Gain    | 36.00      |
| Temperature (degree C) | 20.000                                                      |                       |                 |                 |            | Sweep Width (Hz) | 50000.00   |

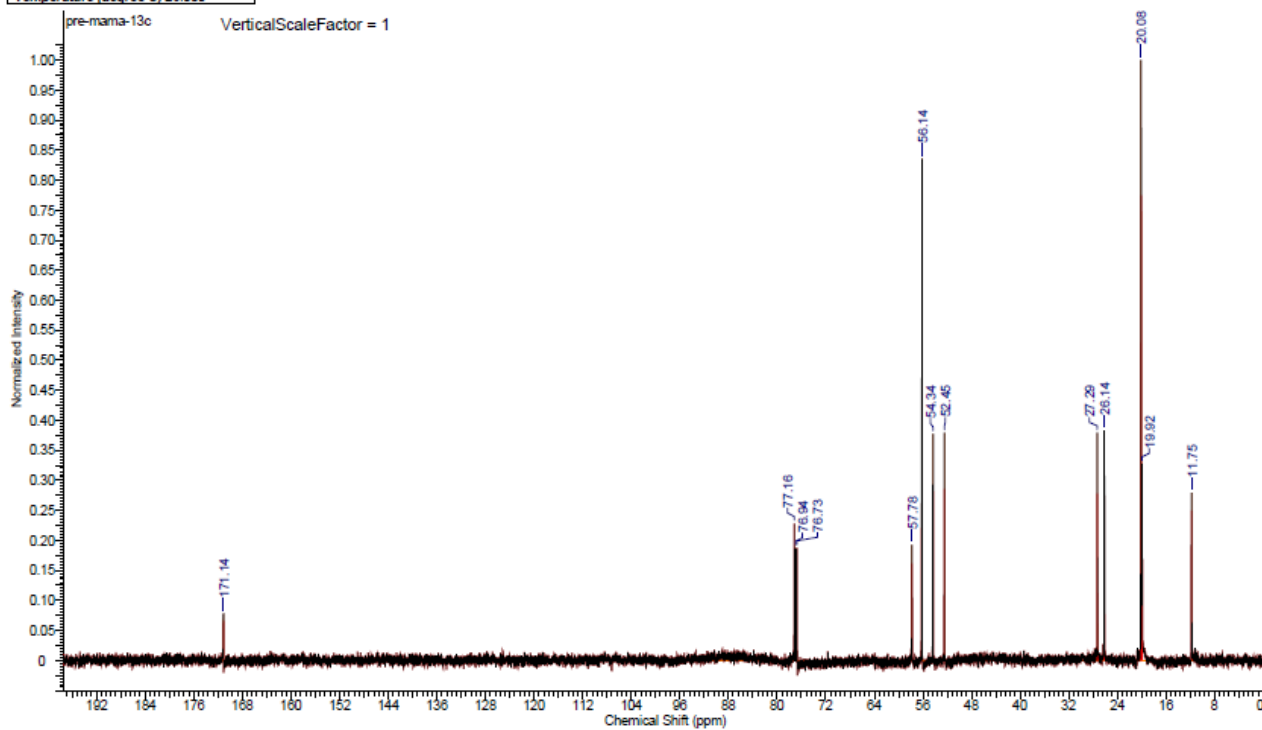

<sup>13</sup>C NMR of  $\alpha$ -dipropylamino *N,N'*-diisobutylacetamide **1**.

|                        |                      |                      |                                                   |                        |                      |
|------------------------|----------------------|----------------------|---------------------------------------------------|------------------------|----------------------|
| Acquisition Time (sec) | 1.0224               | Comment              | pre mama hexyl                                    | Date                   | 04 Dec 2013 12:43:52 |
| Date Stamp             | 04 Dec 2013 12:43:52 | File Name            | C:\Users\Admin\Desktop\shikha\baro-shikha-1h\3\fd | Frequency (MHz)        | 500.13               |
| Nucleus                | <sup>1</sup> H       | Number of Transients | 64                                                | Origin                 | av500                |
| Points Count           | 8192                 | Pulse Sequence       | zg                                                | Original Points Count  | 8192                 |
| Spectrum Offset (Hz)   | 2264.1450            | Receiver Gain        | 90.50                                             | SW(cyclical) (Hz)      | 8012.82              |
| Spectrum Type          | STANDARD             | Sweep Width (Hz)     | 8011.84                                           | Temperature (degree C) | 27.000               |
|                        |                      |                      |                                                   | Solvent                | CHLOROFORM-d         |

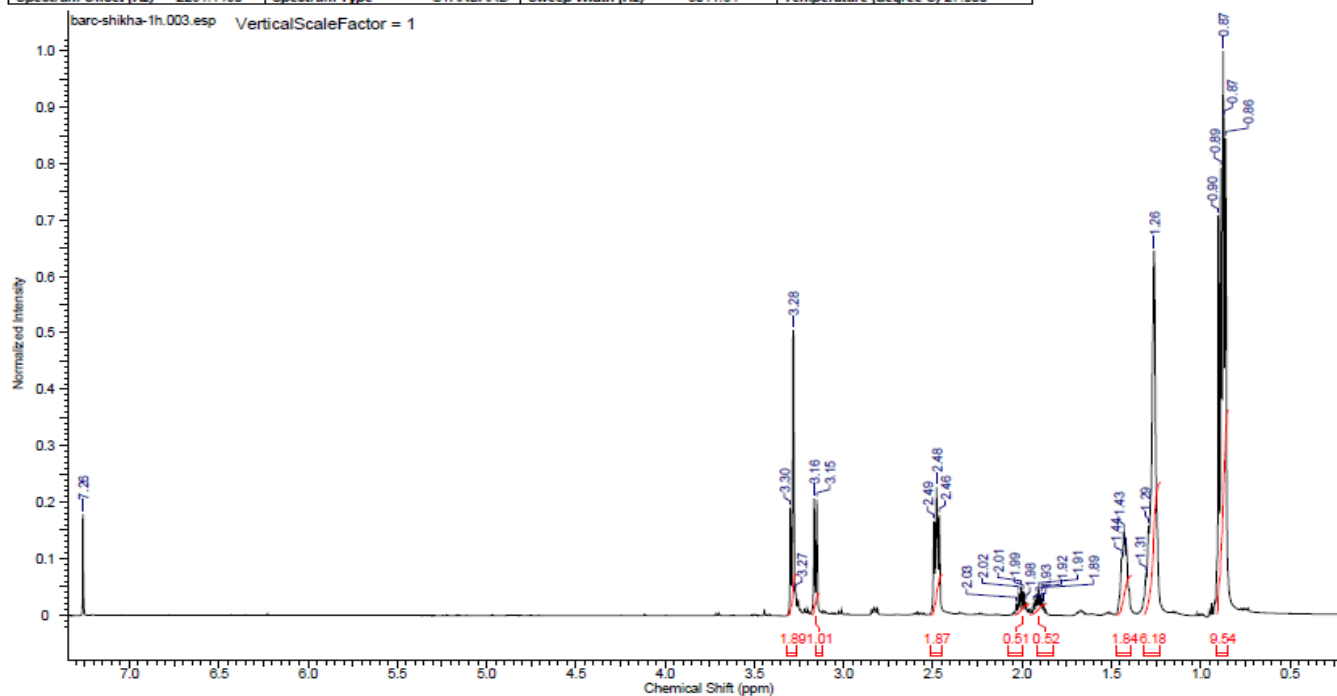

<sup>1</sup>H NMR of  $\alpha$ -dihexylamino *N,N'*-diisobutylacetamide **2**.

|                        |                      |                      |                                                            |                      |                      |
|------------------------|----------------------|----------------------|------------------------------------------------------------|----------------------|----------------------|
| Acquisition Time (sec) | 0.2703               | Comment              | pre mama hexyl                                             | Date                 | 04 Dec 2013 15:17:28 |
| Date Stamp             | 04 Dec 2013 15:17:28 | File Name            | C:\Users\Admin\Desktop\shikha\baro-shikha-13C-4dec13\1.fid |                      |                      |
| Frequency (MHz)        | 125.76               | Nucleus              | 13C                                                        | Number of Transients | 545                  |
| Owner                  | guest                | Points Count         | 8192                                                       | Pulse Sequence       | zgpgc                |
| Solvent                | CHLOROFORM-d         | Spectrum Offset (Hz) | 13513.8164                                                 | Receiver Gain        | 1820.00              |
| Temperature (degree C) | 27.000               | Spectrum Type        | STANDARD                                                   | SW(cyclical) (Hz)    | 30303.03             |
|                        |                      |                      |                                                            | Sweep Width (Hz)     | 30299.33             |

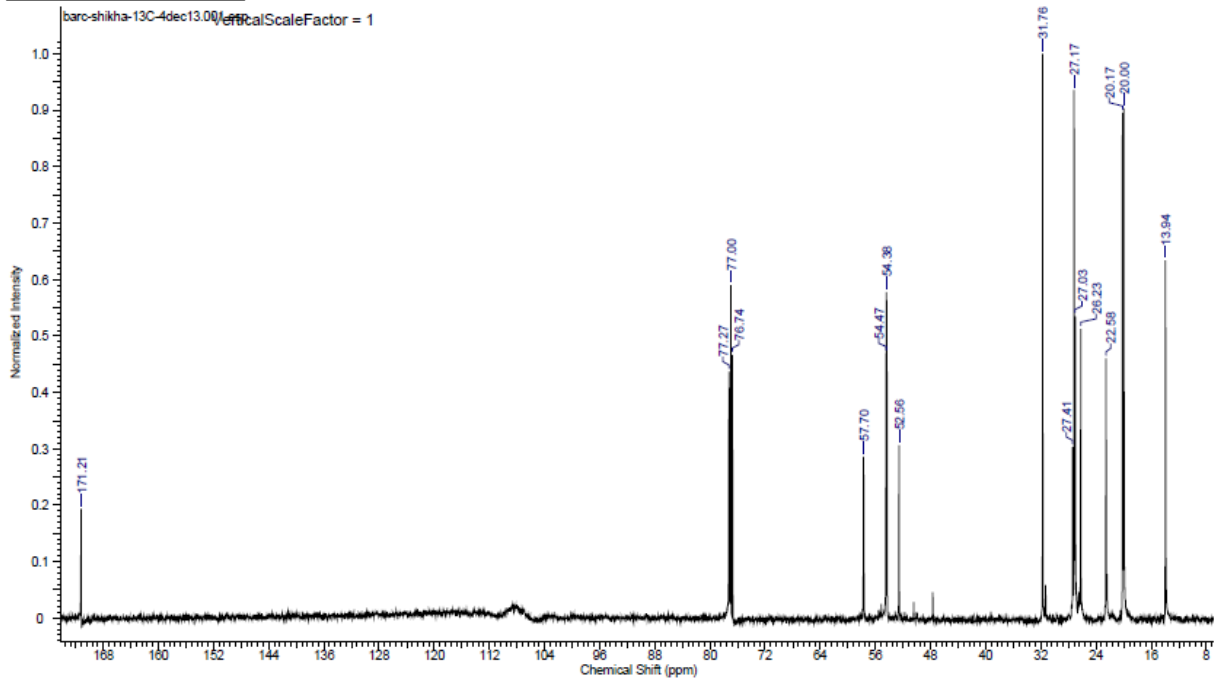

$^{13}\text{C}$  NMR of  $\alpha$ -dihexylamino  $N,N'$ -diisobutylacetamide **2**.



|                        |                      |                      |                                   |                        |                      |
|------------------------|----------------------|----------------------|-----------------------------------|------------------------|----------------------|
| Acquisition Time (sec) | 1.0224               | Comment              | pre mama hexyl                    | Date                   | 04 Dec 2013 12:24:40 |
| Date Stamp             | 04 Dec 2013 12:24:40 | File Name            | C:\Users\Admin\Desktop\shika4\fid | Frequency (MHz)        | 500.13               |
| Nucleus                | 1H                   | Number of Transients | 64                                | Origin                 | av500                |
| Points Count           | 8192                 | Pulse Sequence       | zg                                | Original Points Count  | 8192                 |
| Spectrum Offset (Hz)   | 2074.9929            | Receiver Gain        | 90.50                             | SW(cyclical) (Hz)      | 8012.82              |
|                        |                      | Spectrum Type        | STANDARD                          | Solvent                | CHLOROFORM-d         |
|                        |                      |                      |                                   | Sweep Width (Hz)       | 8011.84              |
|                        |                      |                      |                                   | Temperature (degree C) | 27.000               |

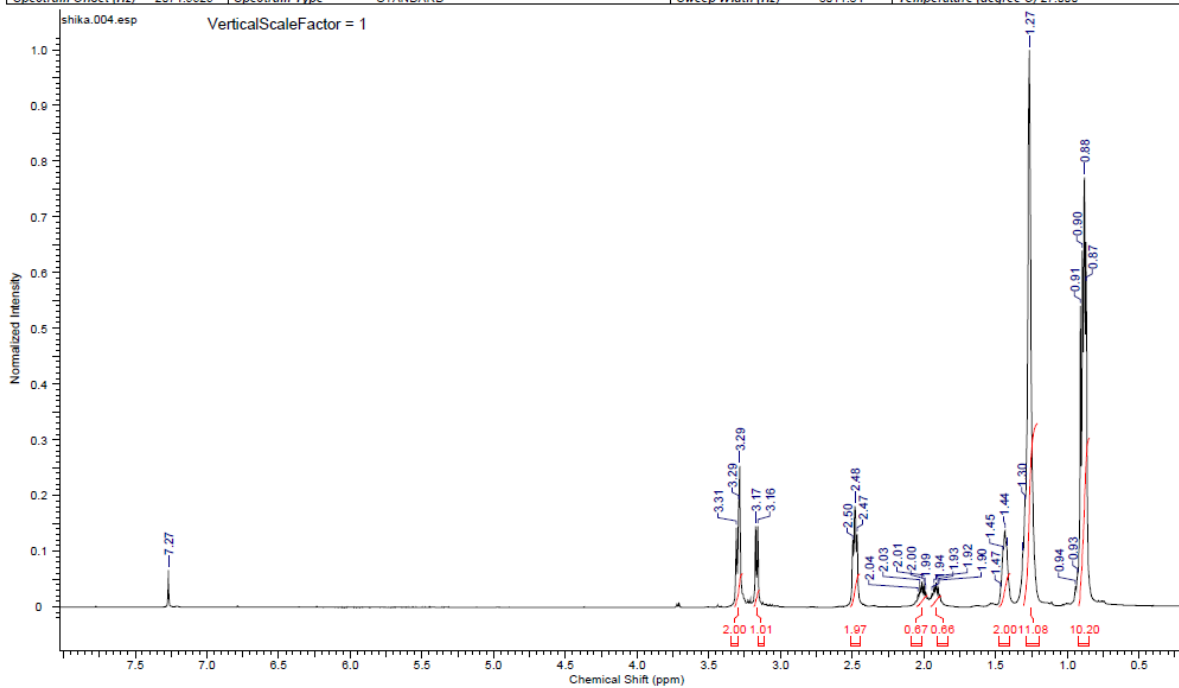

$^1\text{H}$  NMR of  $\alpha$ -dioctylamino  $N,N'$ -diisobutylacetamide **3**.

|                        |                      |                      |                                                            |                      |                      |
|------------------------|----------------------|----------------------|------------------------------------------------------------|----------------------|----------------------|
| Acquisition Time (sec) | 0.2703               | Comment              | pre mama octyl                                             | Date                 | 04 Dec 2013 15:43:04 |
| Date Stamp             | 04 Dec 2013 15:43:04 | File Name            | C:\Users\Admin\Desktop\shikha\baro-shikha-13C-4dec13\2.fid |                      |                      |
| Frequency (MHz)        | 125.76               | Nucleus              | <sup>13</sup> C                                            | Number of Transients | 485                  |
| Owner                  | guest                | Points Count         | 8192                                                       | Origin               | av500                |
| Solvent                | CHLOROFORM-d         | Pulse Sequence       | zgdc                                                       | Receiver Gain        | 1820.00              |
| Temperature (degree C) | 37.000               | Spectrum Offset (Hz) | 13510.4238                                                 | Spectrum Type        | STANDARD             |
|                        |                      |                      |                                                            | Sweep Width (Hz)     | 30303.03             |

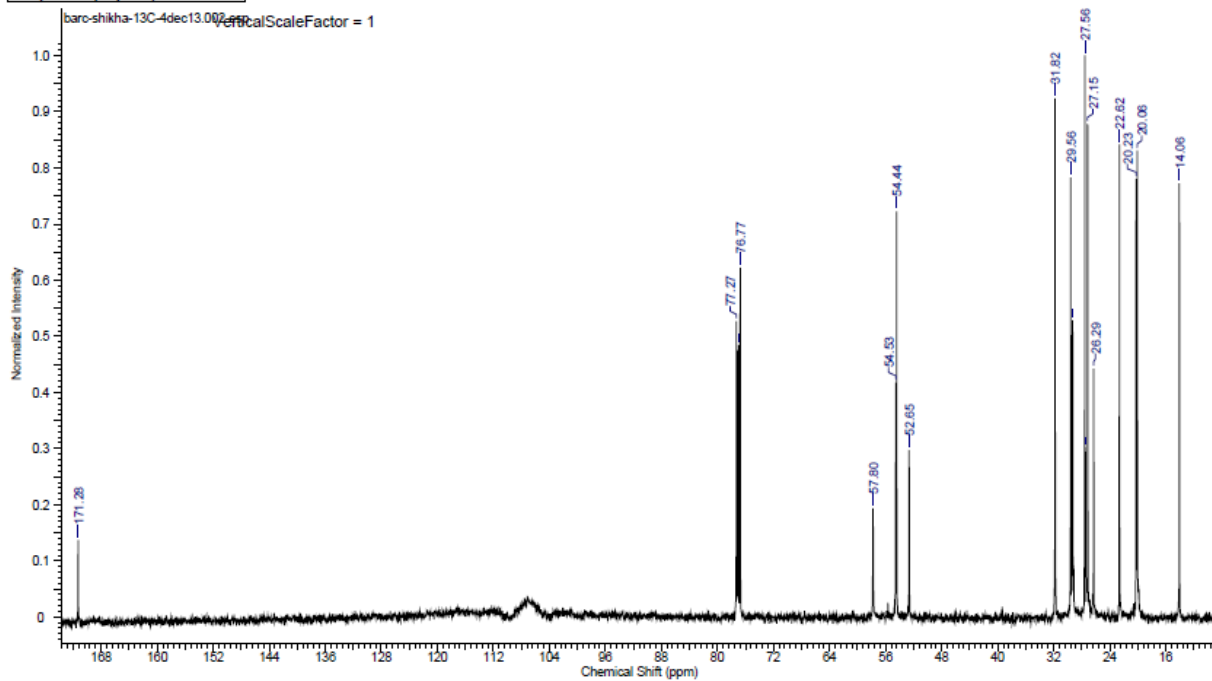

<sup>13</sup>C NMR of  $\alpha$ -dioctylamino *N,N'*-diisobutylacetamide **3**.
